# Supplementary material
Source: PubMed Central journal article supplement (PMC6387628)
Supplement: NIHMS1008956-supplement-4.pdf [file NIHMS1008956-supplement-4.pdf]

# PROTEOMICS

**Supporting Information**

**for Proteomics**

**DOI 10.1002/pmic.201700427**

Katelyn E. Connelly, Victoria Hedrick, Tiago Jose Paschoal Sobreira,  
Emily C. Dykhuizen and Uma K. Aryal

**Analysis of Human Nuclear Protein Complexes by Quantitative Mass  
Spectrometry Profiling**
